# Supplementary material
Source: publisher figshare collection journal article supplement (https://acs.figshare.com/ndownloader/files/10415892)
Supplement: Supplementary file 1 [file 10415892]

An organelle-directed Staudinger reaction enabling fluorescence-on  
resolution of mitochondrial electropotentials via a self-immolative charge  
reversal probe

*Zhongwei Xue,<sup>a</sup> Rui Zhu,<sup>a</sup> Siyu Wang,<sup>a</sup> Jian Li,<sup>a</sup> Jiahuai Han,<sup>b</sup> Jian Liu,<sup>c,a\*</sup> and Shoufa Han<sup>a,\*</sup>*

<sup>a</sup>Department of Chemical Biology, College of Chemistry and Chemical Engineering, State Key Laboratory for Physical Chemistry of Solid Surfaces, the Key Laboratory for Chemical Biology of Fujian Province, The MOE Key Laboratory of Spectrochemical Analysis & Instrumentation, and Innovation Center for Cell Signaling Network, Xiamen University; <sup>b</sup>State key Laboratory of Cellular Stress Biology, Innovation Center for Cell Signaling Network, School of Life Sciences, Xiamen University, Xiamen, 361005, China;

<sup>c</sup>School of Pharmacy, Lanzhou University, Lanzhou, 73000, China

**Corresponding author**

\*To whom correspondence should be addressed. E-mail: shoufa@xmu.edu.cn,

jianliu@lzu.edu.cn

Fax: +865922181728. Xiamen University.

## Content

### Experimental Procedure

Fig. S1 HRMS confirms genesis of F-TPP by Staudinger reduction of  $^{Az}F$ -TPP.

Fig. S2 Incapability of mitochondria to uptake F-TPP.

Fig. S3 Phosphine dependent staining of mitochondria.

Fig. S4 CCCP-dose dependent  $\Delta\Psi_m$  changes detected by intra-mitochondrial Staudinger reaction..

Fig. S5 Cytotoxicity of  $PPh_3$  on  $^{Az}F$ -TPP treated cells.

Fig. S6 Cytotoxicity of  $^{Az}F$ -TPP on  $PPh_3$ -treated cells.

Fig. S7 Selectivity of  $^{Az}F$ -TPP towards  $PPh_3$  over biological reductants.

Fig. S8 Photostability of F-TPP.

Fig. S9  $^1H$ -NMR of F-TPP

Fig. S10  $^{13}C$ -DEPT NMR of F-TPP

Fig. S11  $^1H$ -NMR of  $^{Az}F$ -TPP

Fig. S12  $^{13}C$ -DEPT NMR of  $^{Az}F$ -TPP

Fig. S13  $^1H$ -NMR of  $^{Az}F$

Fig. S14  $^{13}C$ -DEPT NMR of  $^{Az}F$

Fig. S15  $^1H$ -NMR of  $PPh_3$ -TPP

Fig. S16  $^{13}C$  NMR of  $PPh_3$ -TPP

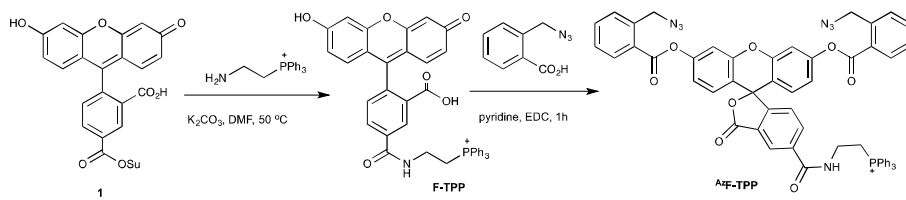

**Scheme S1.** Synthesis of F-TTP and <sup>Az</sup>F-TTP

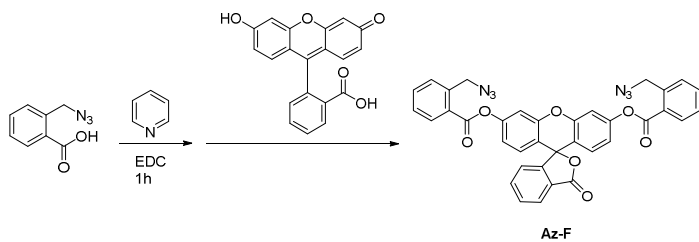

**Scheme S2.** Synthesis of F-TTP and <sup>Az</sup>F

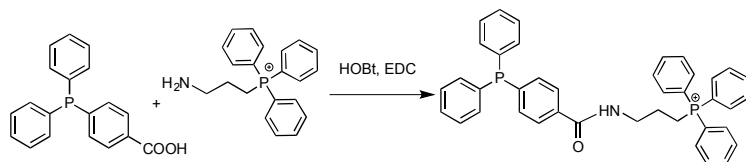

**Scheme S3.** Synthesis of PPh<sub>3</sub>-TTP

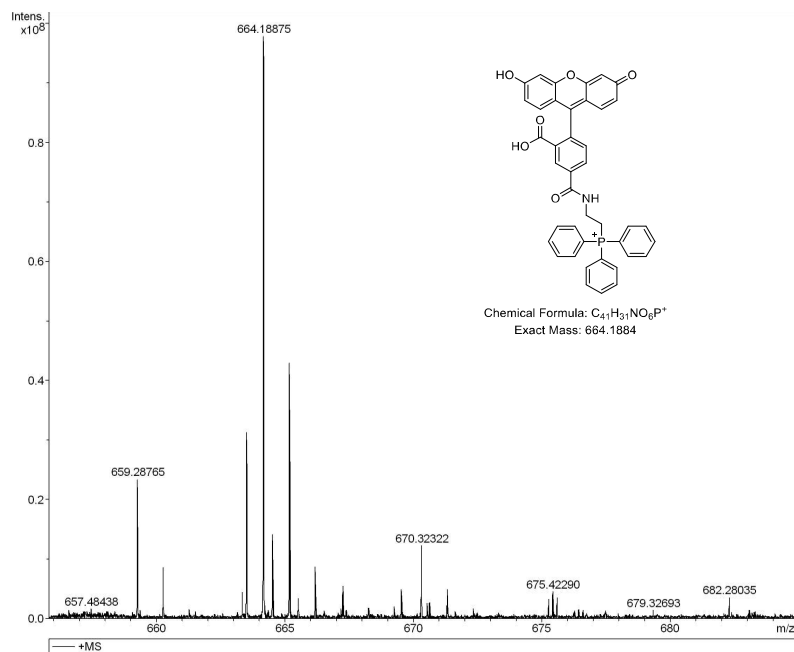

**Figure S1.** HRMS confirms genesis of F-TTP by Staudinger reduction of <sup>Az</sup>F-TTP.

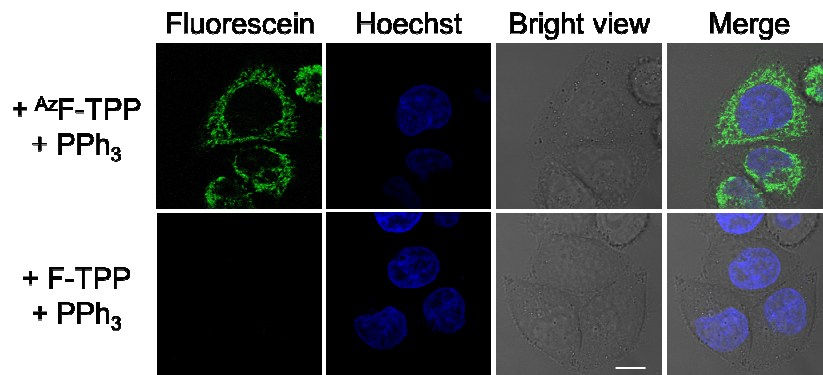

**Figure S2.** Incapability of mitochondria to uptake F-TPP. HeLa cells were respectively cultivated with F-TPP or  $\text{AzF-TPP}$  in the presence of  $\text{PPh}_3$  and then analysed by confocal fluorescence microscopy. Bar, 10  $\mu\text{m}$ .

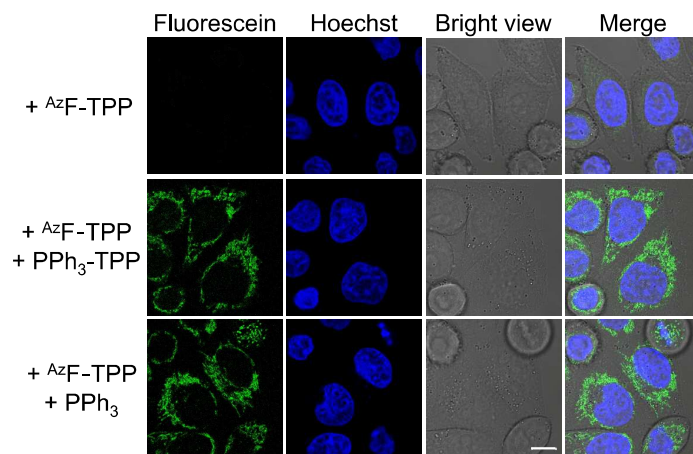

**Figure S3.** Phosphine dependent staining of mitochondria. HeLa cells were respectively cultivated with  $\text{AzF-TPP}$  (5  $\mu\text{M}$ ) together with  $\text{PPh}_3$  (8  $\mu\text{M}$ ),  $\text{PPh}_3\text{-TPP}$  (8  $\mu\text{M}$ ), or no addition for 1 h and then analysed by confocal fluorescence microscopy. Bar, 10  $\mu\text{m}$ .

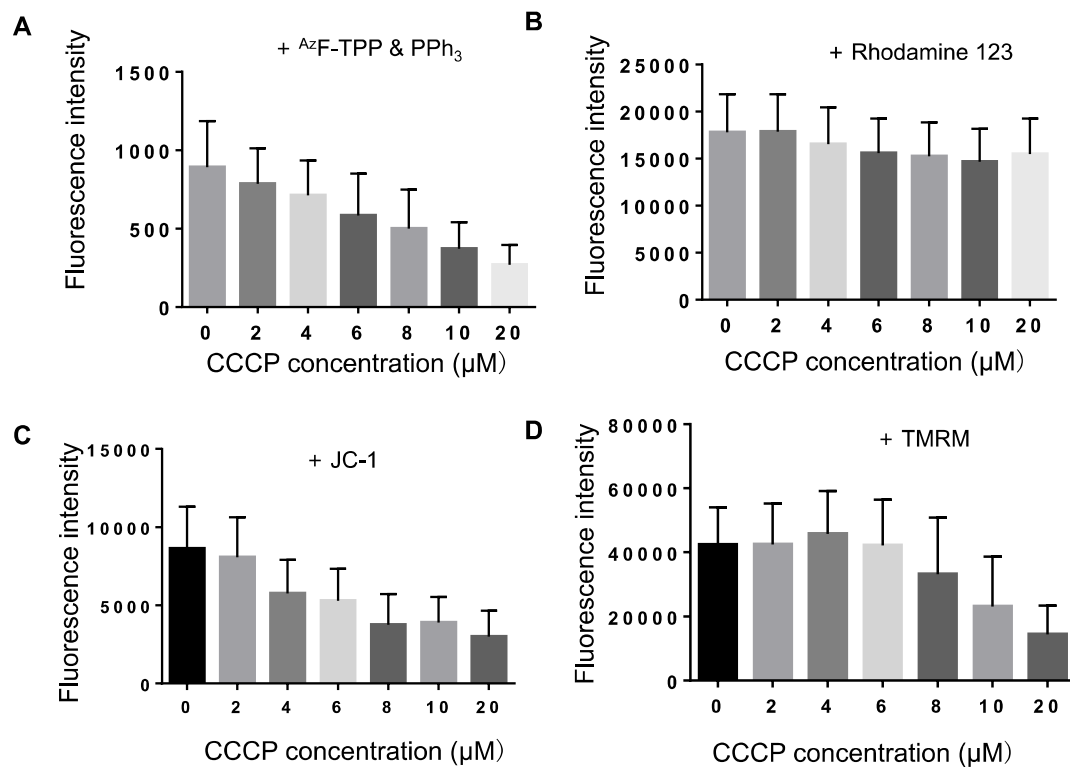

**Figure S4.** CCCP-dose dependent  $\Delta\Psi_m$  changes detected by intra-mitochondrial Staudinger reaction. HeLa cells were cultured with various doses of CCCP and then stained with <sup>Az</sup>F-TPP/PPh<sub>3</sub> (A), rhodamine 123 (B), JC-1 (C) or TMRM (D), and then analyzed by flow cytometry for intracellular fluorescence. Error bars represent standard deviation of 10000 cells.

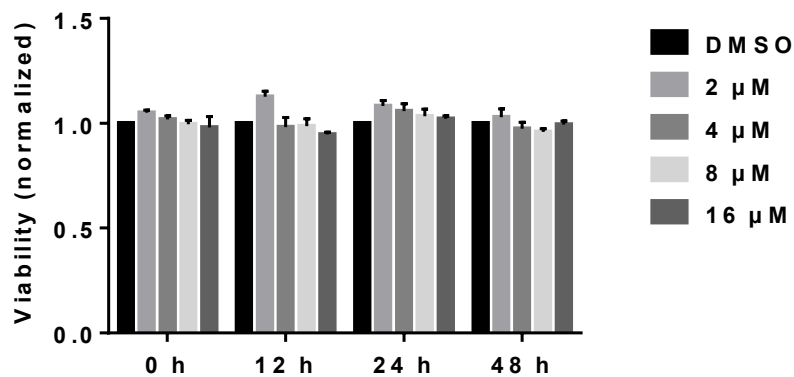

**Figure S5.** Cytotoxicity of PPh<sub>3</sub> on <sup>Az</sup>F-TPP treated cells. HeLa cells were incubated with <sup>Az</sup>F-TPP and various doses of PPh<sub>3</sub> and then cells were incubated for 0, 12, 24, and 48 h. The cell viability were determined by MTT assay.

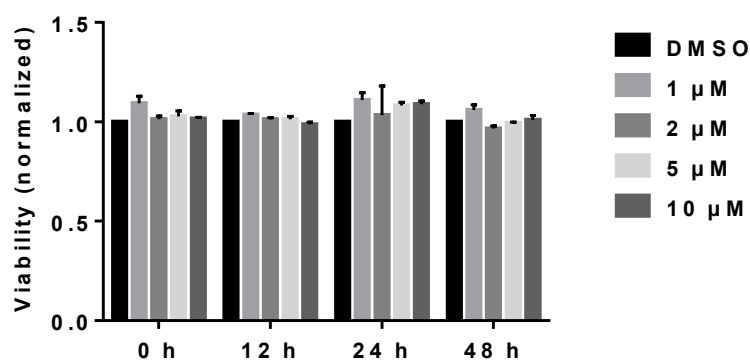

**Figure S6.** Cytotoxicity of  $^{Az}F$ -TPP on  $PPh_3$ -treated cells. HeLa cells were incubated with  $PPh_3$  and various doses of  $^{Az}F$ -TPP and then cells were incubated for 0, 12, 24, and 48 h. The cell viability were determined by MTT assay.

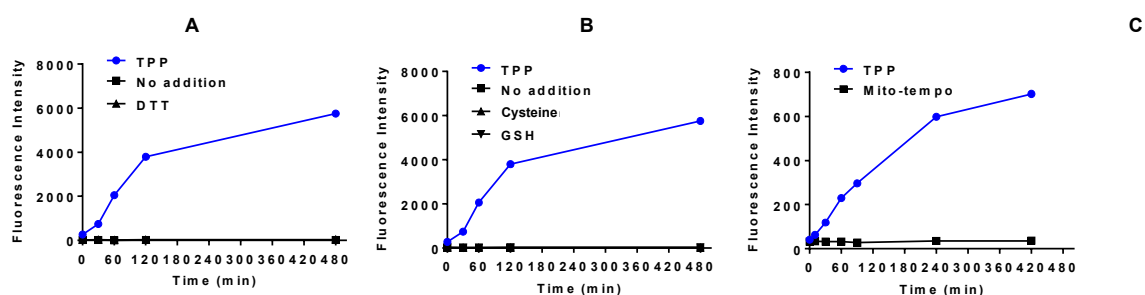

**Figure S7.** Selectivity of  $^{Az}F$ -TPP towards  $PPh_3$  over biological reductants. To  $^{Az}F$ -TPP (10 mM) in Tris-HCl buffer (pH 8, 100 mM, 40% DMF) were added dithiothreitol (DTT) (25 mM) (A), cysteine (25 mM), GSH (25 mM), Mito-Tempo (0.6 mM),  $PPh_3$  (0.6 mM) or no addition. Fluorescence emission of the the samples (Ex: 515 nm) were monitored and recorded as a function of incubation time.

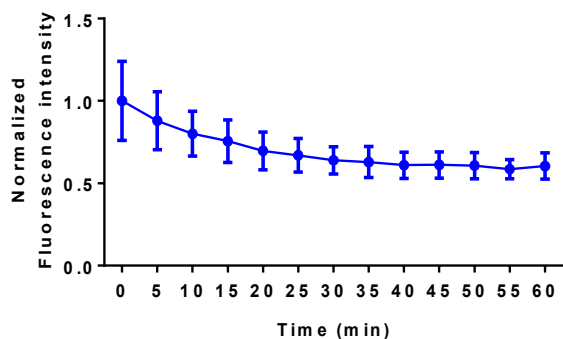

**Figure S8.** Photophysical properties of F-TPP in HeLa cells. Cells preincubated with  $^{Az}F$ -TPP/ $PPh_3$  were constantly illuminated and scanned for 12 times with a confocal fluorescence microscope (Ex@488 nm). The fluorescence of cells were calculated by ImagingJ and normalized. Error bars represent standard deviation of 10 cells.

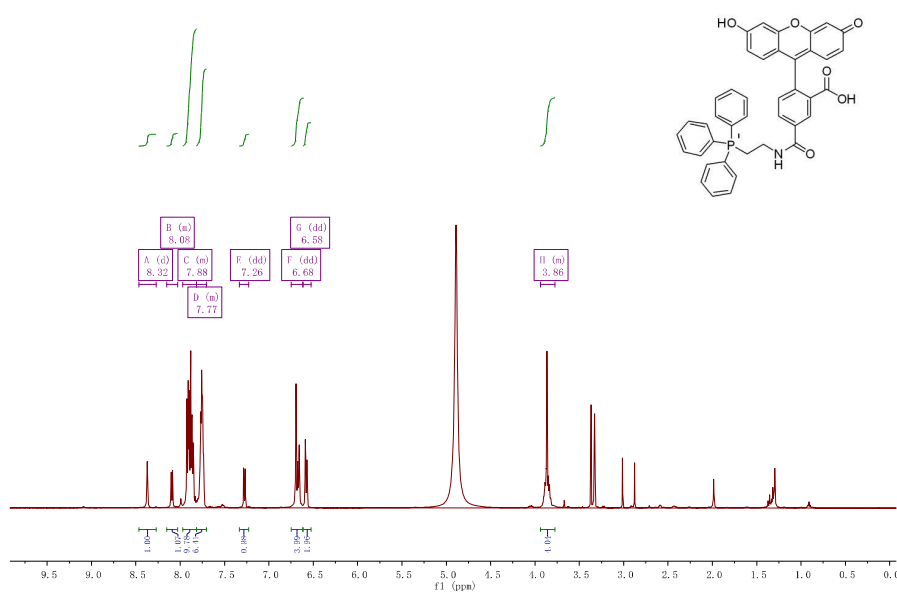

**Figure S9.** <sup>1</sup>H-NMR of F-TPP

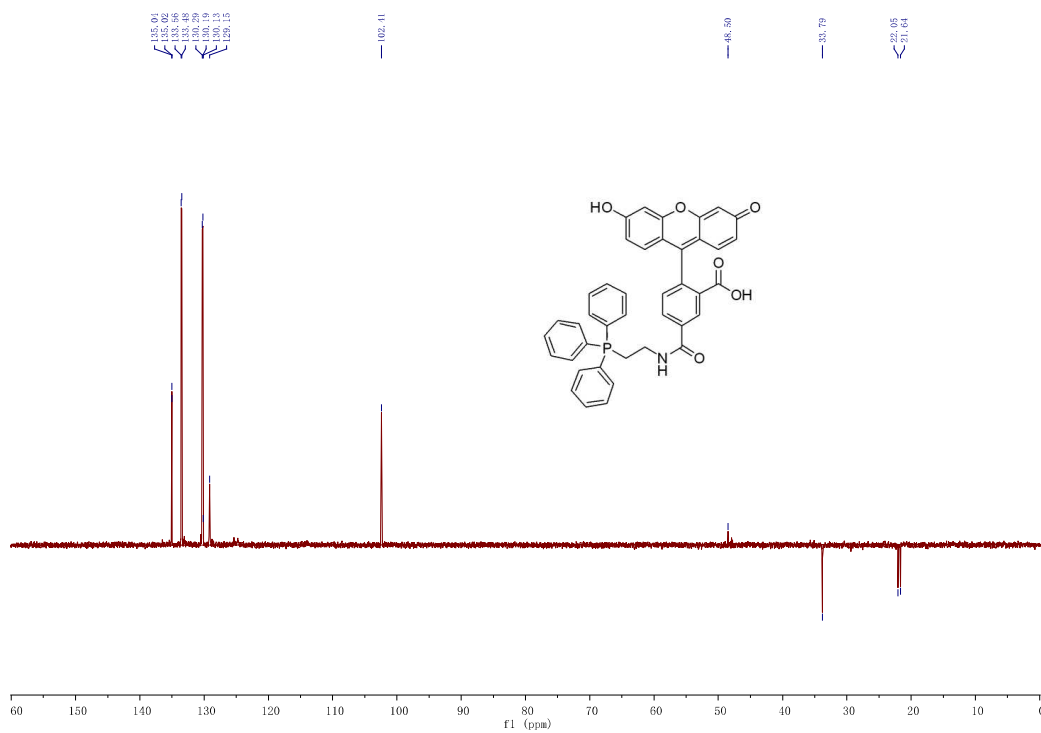

**Figure S10.** <sup>13</sup>C-DEPT NMR of F-TPP

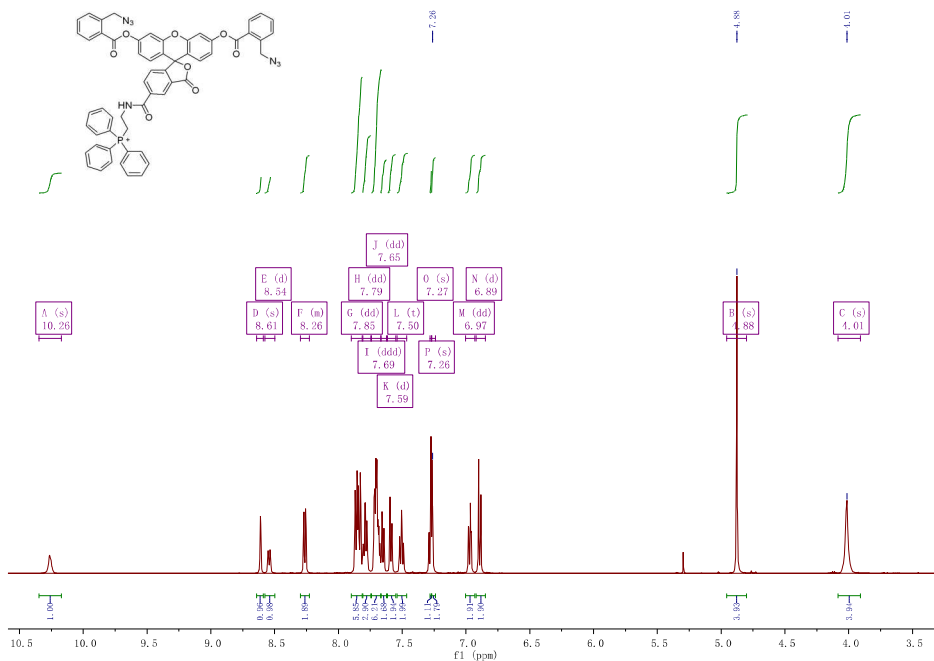

**Figure S11.** <sup>1</sup>H-NMR of <sup>Az</sup>F-TPP

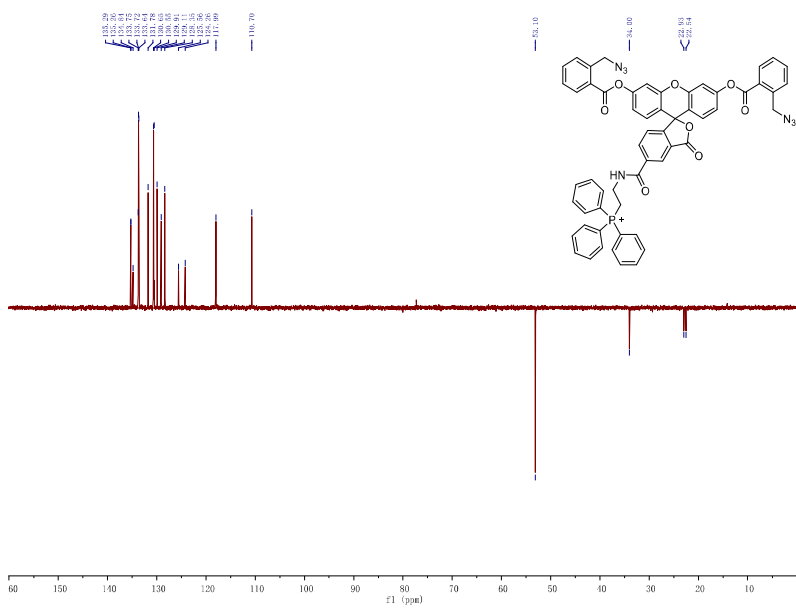

**Figure S12.** <sup>13</sup>C-DEPT NMR of <sup>Az</sup>F-TPP



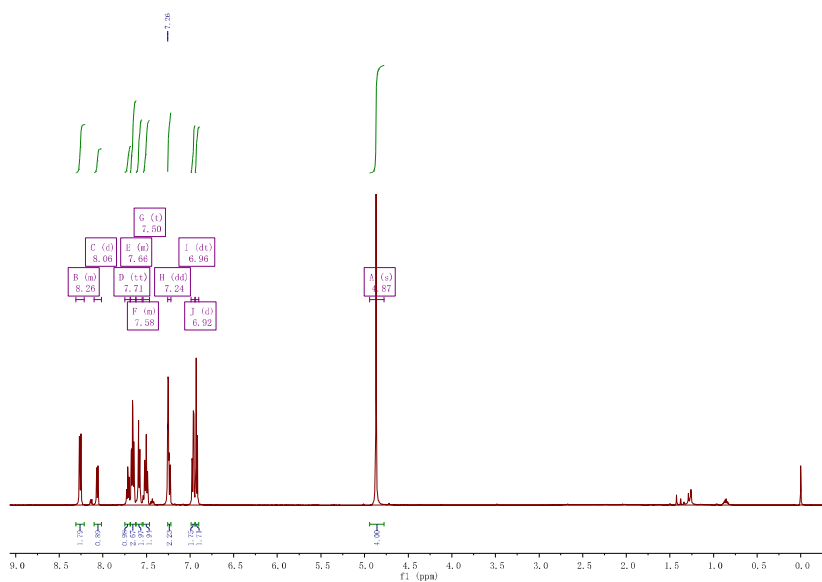

Figure S13. <sup>1</sup>H-NMR of AzF

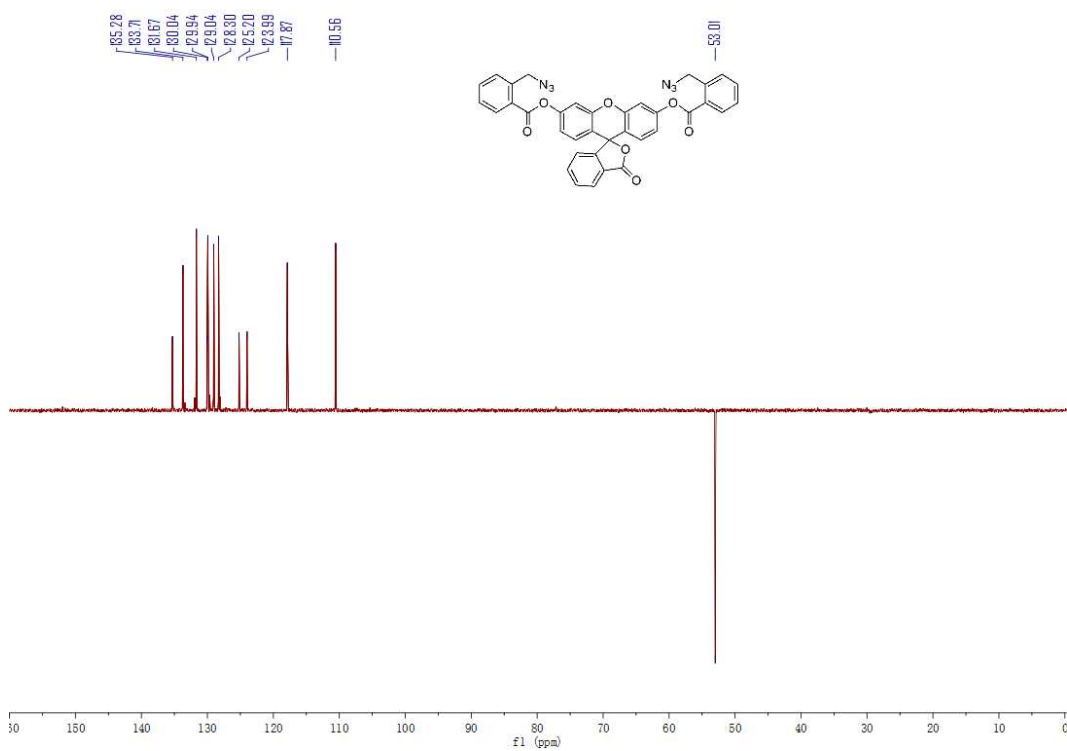

Figure S14. <sup>13</sup>C-DEPT NMR of AzF

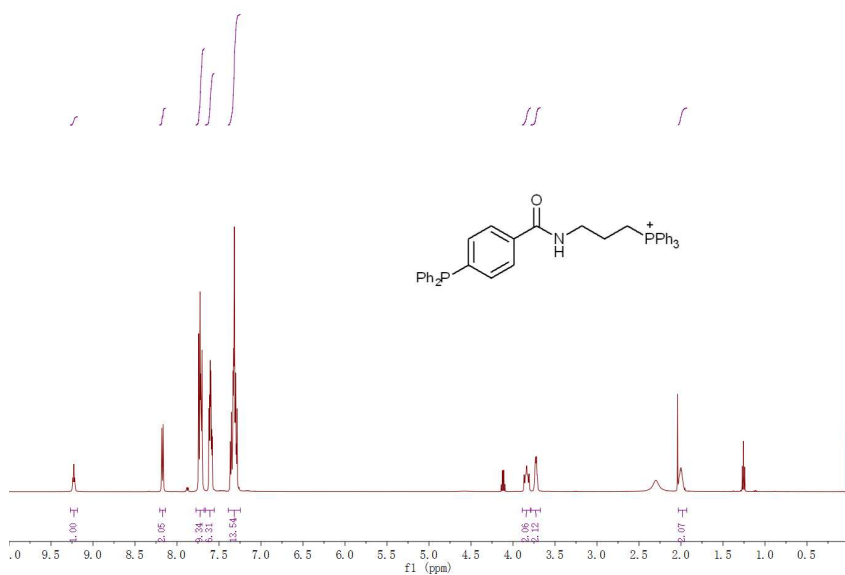

Figure S15. <sup>1</sup>H-NMR of PPh<sub>3</sub>-TPP

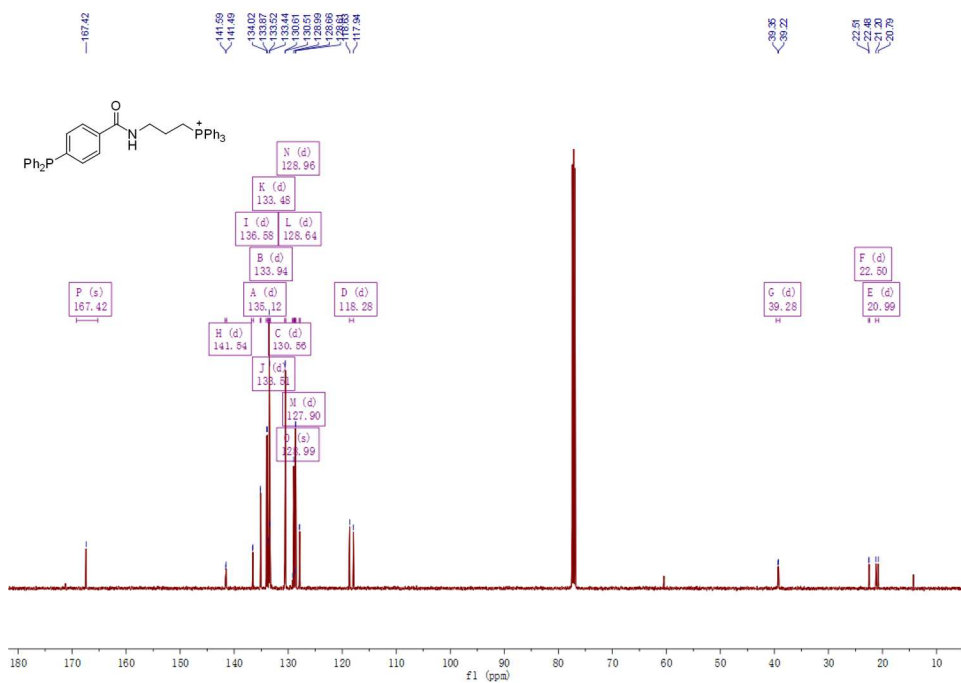

Figure S16. <sup>13</sup>C NMR of PPh<sub>3</sub>-TPP
